# Supplementary material for: Modeling fetal cortical development by quantile regression for gestational age and head circumference: a prospective cross sectional study
Source: publisher site journal article supplement (doi:10.1515/jpm-2023-0176), 2023-08-19
Supplement: Supplementary file 2 [file j_jpm-2023-0176_suppl_002.docx]

**Supplementary Table 2**; Quantreg code used to evaluate quantile regression (score= Gestational age or head circumference); hours (sylvian fissure, parieto occipital fissure, calcarine fissure; tau (0.3, 0.5, 0.9,0.95, 0.97)

library(quantreg)

#fit model

model <- rq(score ~ hours, data = df, tau = 0.x)

#view summary of model

summary(model)

**Supplementary Table 3** Distribution of the population studied for gestational age (number of cases included) and corresponding head circumference values

| **Weeks** | **N** | **minimum** | **Lower interquantile range** | **median** | **Higher interquartile range** | **maximum** |
| --- | --- | --- | --- | --- | --- | --- |
| 19-20 | 20 | 152 | 163 | 166 | 171 | 184 |
| 20-21 | 40 | 167 | 175 | 179 | 185 | 189 |
| 21-22 | 21 | 178 | 185 | 189 | 194 | 199 |
| 22-23 | 20 | 189 | 197 | 202 | 211 | 218 |
| 23-24 | 20 | 198 | 208 | 213 | 217 | 222 |
| 24-25 | 22 | 218 | 222 | 224 | 230 | 242 |
| 25-26 | 24 | 222 | 229 | 237 | 244 | 250 |
| 26-27 | 23 | 234 | 240 | 242 | 246 | 257 |
| 27-28 | 20 | 242 | 251 | 255 | 257 | 263 |
| 28-29 | 20 | 249 | 264 | 266 | 269 | 291 |
| 29-30 | 26 | 253 | 271 | 280 | 288 | 296 |
| 30-31 | 22 | 261 | 274 | 281 | 292 | 305 |
| 31-32 | 23 | 272 | 283 | 290 | 298 | 315 |
| 32-33 | 20 | 280 | 297 | 303 | 313 | 323 |
| 33-34 | 23 | 286 | 299 | 307 | 319 | 330 |

**Supplementary Table 4** Fitted quantile regression coefficients for cortical fissure depth against gestational age

| **Sylvian Fissure** |  |  |  |  |  |  |  |
| --- | --- | --- | --- | --- | --- | --- | --- |
|  | 3 | 5 | 10 | 50 | 90 | 95 | 97 |
| constant | -4.677 | -4.365 | -4.738 | -5.259 | -4.838 | -4.947 | -4.400 |
| slope | 0.467 | 0.466 | 0.489 | 0.555 | 0.592 | 0.614 | 0.600 |
|  |  |  |  |  |  |  |  |
| **Parieto Occipital Fissure** |  |  |  |  |  |  |  |
|  | 3 | 5 | 10 | 50 | 90 | 95 | 97 |
| constant | -6.136 | -6.484 | -6.366 | -7.103 | -6.888 | -6.310 | -5.895 |
| slope | 0.406 | 0.425 | 0.424 | 0.483 | 0.504 | 0.490 | 0.479 |
|  |  |  |  |  |  |  |  |
| **Calcarine Fissure** |  |  |  |  |  |  |  |
|  | 3 | 5 | 10 | 50 | 90 | 95 | 97 |
| constant | -4.006 | -4.013 | -4.364 | -4.577 | -4.891 | -4.960 | -5.022 |
| slope | 0.355 | 0.357 | 0.380 | 0.414 | 0.457 | 0.472 | 0.480 |

**Supplementary Table 5** Fitted quantile regression coefficients for cortical fissure depth against head circumference.

| **Sylvian Fissure** |  |  |  |  |  |  |  |
| --- | --- | --- | --- | --- | --- | --- | --- |
|  | 3 | 5 | 10 | 50 | 90 | 95 | 97 |
| constant | -3.333 | -3.534 | -3.855 | -3.499 | -2.719 | -2.498 | -2.713 |
| slope | 0.047 | 0.048 | 0.050 | 0.053 | 0.055 | 0.055 | 0.057 |
|  |  |  |  |  |  |  |  |
| **Parieto Occipital Fissure** |  |  |  |  |  |  |  |
|  | 3 | 5 | 10 | 50 | 90 | 95 | 97 |
| constant | -5.690 | -5.650 | -5.714 | -5.442 | -5.287 | -5.429 | -5.462 |
| slope | 0.044 | 0.044 | 0.045 | 0.046 | 0.047 | 0.048 | 0.049 |
|  |  |  |  |  |  |  |  |
| **Calcarine Fissure** |  |  |  |  |  |  |  |
|  | 3 | 5 | 10 | 50 | 90 | 95 | 97 |
| constant | -3.419 | -3.199 | -3.141 | -3.309 | -3.413 | -3.186 | -3.118 |
| slope | 0.037 | 0.037 | 0.037 | 0.040 | 0.043 | 0.043 | 0.043 |

**Supplementary Table 6**: Comparison of pseudo R-square and Mean absolute error (MAE) obtained using as gestational age and head circumference as dependent variable at different quantile values. Pseudo R-square values resulted significantly higher and MAE values lower when head circumference was used as dependent variable at all the quantile tested (p≤0.001)..

| **Sylvian fissure GA** |  |  |  |  |  |  |  |
| --- | --- | --- | --- | --- | --- | --- | --- |
|  | 3 | 5 | 10 | 50 | 90 | 95 | 97 |
| Pseudo R-square | 0.588 | 0.599 | 0.624 | 0.644 | 0.553 | 0.549 | 0.564 |
| MAE | 1.785 | 1.536 | 1.331 | 0.786 | 1.436 | 1.825 | 1.9895 |
| **Sylvian fissure HC** |  |  |  |  |  |  |  |
|  | 3 | 5 | 10 | 50 | 90 | 95 | 97 |
| Pseudo R-square | 0.639 | 0.652 | 0.670 | 0.688 | 0.625 | 0.605 | 0.603 |
| MAE | 1.506 | 1.364 | 1.130 | 0.689 | 1.232 | 1.483 | 1.694 |
|  |  |  |  |  |  |  |  |
| **Parieto Occipital fissure GA** | |  |  |  |  |  |  |
|  | 3 | 5 | 10 | 50 | 90 | 95 | 97 |
| Pseudo R-square | 0.652 | 0.677 | 0.700 | 0.738 | 0.698 | 0.682 | 0.669 |
| MAE | 1.077 | 0.952 | 0.854 | 0.478 | 0.804 | 0.982 | 1.0977 |
| **Parieto Occipital fissure HC** | |  |  |  |  |  |  |
|  | 3 | 5 | 10 | 50 | 90 | 95 | 97 |
| Pseudo R-square | 0.782 | 0.789 | 0.800 | 0.825 | 0.798 | 0.785 | 0.776 |
| MAE | 0.732 | 0.677 | 0.535 | 0.319 | 0.547 | 0.643 | 0.734 |
|  |  |  |  |  |  |  |  |
| **Calcarine Fissure GA** |  |  |  |  |  |  |  |
|  | 3 | 5 | 10 | 50 | 90 | 95 | 97 |
| Pseudo R-square | 0.644 | 0.652 | 0.665 | 0.716 | 0.645 | 0.620 | 0.606 |
| MAE | 1.010 | 0.969 | 0.770 | 0.466 | 0.838 | 1.116 | 1.2556 |
| **Calcarine Fissure HC** |  |  |  |  |  |  |  |
|  | 3 | 5 | 10 | 50 | 90 | 95 | 97 |
| Pseudo R-square | 0.733 | 0.740 | 0.745 | 0.760 | 0.717 | 0.719 | 0.723 |
| MAE | 0.791 | 0.709 | 0.638 | 0.393 | 0.755 | 0.916 | 0.947 |
